# Supplementary material for: Plasmodium falciparum Gametocyte Enrichment in Peripheral Blood Samples by Magnetic Fractionation: Gametocyte Yields and Possibilities to Reuse Columns
Source: PubMed Central journal article supplement (PMC6402936; doi:10.4269/ajtmh.18-0773), 2019-01-02

The following are supplemental materials and will be published online only

**Supplemental Table S1:** Parasite genotyping results by MSP2 analysis of bound MACS column fractions. For three strains in triplicate gametocyte infected blood was run over a new column and after column washing the next day uninfected blood was run. The experiment was performed in triplicate.

|                  |               | Column concentration<br>(par./ $\mu$ l) | MSP2<br>Gel electrophoresis<br>(pos + /neg -) |   | MSP2 capillary<br>gel electrophoresis<br>(fragment size in basepair) |
|------------------|---------------|-----------------------------------------|-----------------------------------------------|---|----------------------------------------------------------------------|
| <b>NF54 (A)</b>  | New column    | 10,000                                  | A1                                            | + | Positive 259 bp (3D7)                                                |
|                  | Washed column | 0                                       | C1                                            | - | Negative                                                             |
| <b>NF54 (B)</b>  | New column    | 10,000                                  | B1                                            | + | Positive 259 bp (3D7)                                                |
|                  | Washed column | 0                                       | D1                                            | - | Negative                                                             |
| <b>NF54 (C)</b>  | New column    | 10,000                                  | E1                                            | + | Positive 259 bp (3D7)                                                |
|                  | Washed column | 0                                       | F1                                            | - | Negative                                                             |
| <b>NF135 (A)</b> | New column    | 10,000                                  | G1                                            | + | Positive 338 bp (3D7)                                                |
|                  | Washed column | 0                                       | H1                                            | + | Positive 338 bp (3D7)                                                |
| <b>NF135 (B)</b> | New column    | 10,000                                  | A2                                            | + | Positive 338 bp (3D7)                                                |
|                  | Washed column | 0                                       | B2                                            | - | Negative                                                             |
| <b>NF135 (C)</b> | New column    | 10,000                                  | C2                                            | + | Positive 338 bp (3D7)                                                |
|                  | Washed column | 0                                       | D2                                            | - | Negative                                                             |
| <b>NF175 (A)</b> | New column    | 10,000                                  | E2                                            | + | Positive 411 bp (FC27)                                               |
|                  | Washed column | 0                                       | F2                                            | - | Negative                                                             |
| <b>NF175 (B)</b> | New column    | 10,000                                  | G2                                            | + | Positive 411 bp (FC27)                                               |
|                  | Washed column | 0                                       | H2                                            | - | Negative                                                             |
| <b>NF175 (C)</b> | New column    | 10,000                                  | A3                                            | + | Positive 411 bp (FC27)                                               |
|                  | Washed column | 0                                       | B3                                            | - | Negative                                                             |

**Supplemental Table S2:** MSP2 MACS bound column fraction results with three different parasite strains on the same column and overnight column washing in between

|                                             |          | Concentration<br>(par./ $\mu$ l) | MSP2<br>Gel electrophoresis<br>(pos + /neg -) |    | MSP2 capillary<br>gel electrophoresis<br>(fragment size in basepair) |                        |
|---------------------------------------------|----------|----------------------------------|-----------------------------------------------|----|----------------------------------------------------------------------|------------------------|
| <b>NF54</b><br><b>NF135</b><br><b>NF175</b> | <b>A</b> | New column                       | 10,000                                        | C3 | +                                                                    | Positive 259 bp (3D7)  |
|                                             |          | Washed column                    | 10,000                                        | D3 | +                                                                    | Positive 338 bp (3D7)  |
|                                             |          | Washed column                    | 10,000                                        | E3 | +                                                                    | Negative               |
| <b>NF54</b><br><b>NF135</b><br><b>NF175</b> | <b>B</b> | New column                       | 10,000                                        | F3 | +                                                                    | Positive 259 bp (3D7)  |
|                                             |          | Washed column                    | 10,000                                        | G3 | +                                                                    | Positive 338 bp (3D7)  |
|                                             |          | Washed column                    | 10,000                                        | H3 | +                                                                    | Positive 411 bp (FC27) |
| <b>NF54</b><br><b>NF135</b><br><b>NF175</b> | <b>C</b> | New column                       | 10,000                                        | A4 | +                                                                    | Positive 259 bp (3D7)  |
|                                             |          | Washed column                    | 10,000                                        | B4 | +                                                                    | Positive 338 bp (3D7)  |
|                                             |          | Washed column                    | 10,000                                        | C4 | +                                                                    | Positive 411 bp (FC27) |

**Supplemental Figure S1: *P. falciparum* gametocyte stained blood smears of in vivo cultures**

Giemsa's stained blood smears of *P. falciparum* in vivo cultures, light microscopy 1,000x magnification. Unsynchronized culture at day 16 with multiple parasites stages (A). NF54 gametocyte N-acetyl-glucosamine treated culture, day 14 (B) and day 16 (C). Ring stage culture after sorbitol treatment (D). Day 16 gametocyte N-acetyl-glucosamine treated cultures of NF135 (E) and NF175 (F).

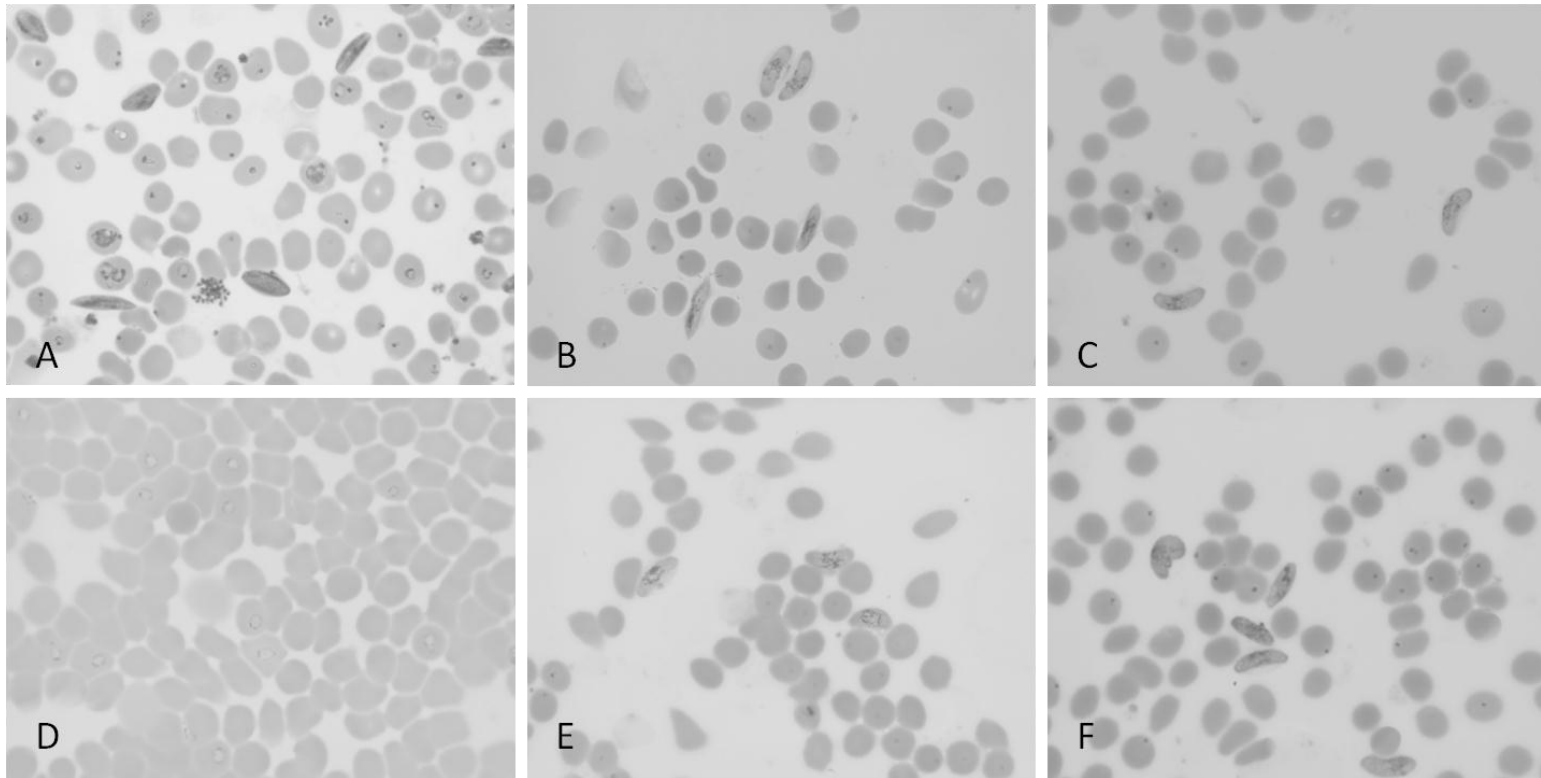

## Supplemental Figure S2. MACS Column Procedure

A QuadroMACS separator (Miltenyi Biotec) with up to four LS columns was used, with a hypodermic needle attached to reduce the flow speed (A+B). Columns were hydrated with RPMI medium (C+D), accordingly peripheral infected or uninfected EDTA blood was added (E). After all material flowed through (F+G), columns were washed two times with RPMI medium to remove unbound red blood cells (H+I).

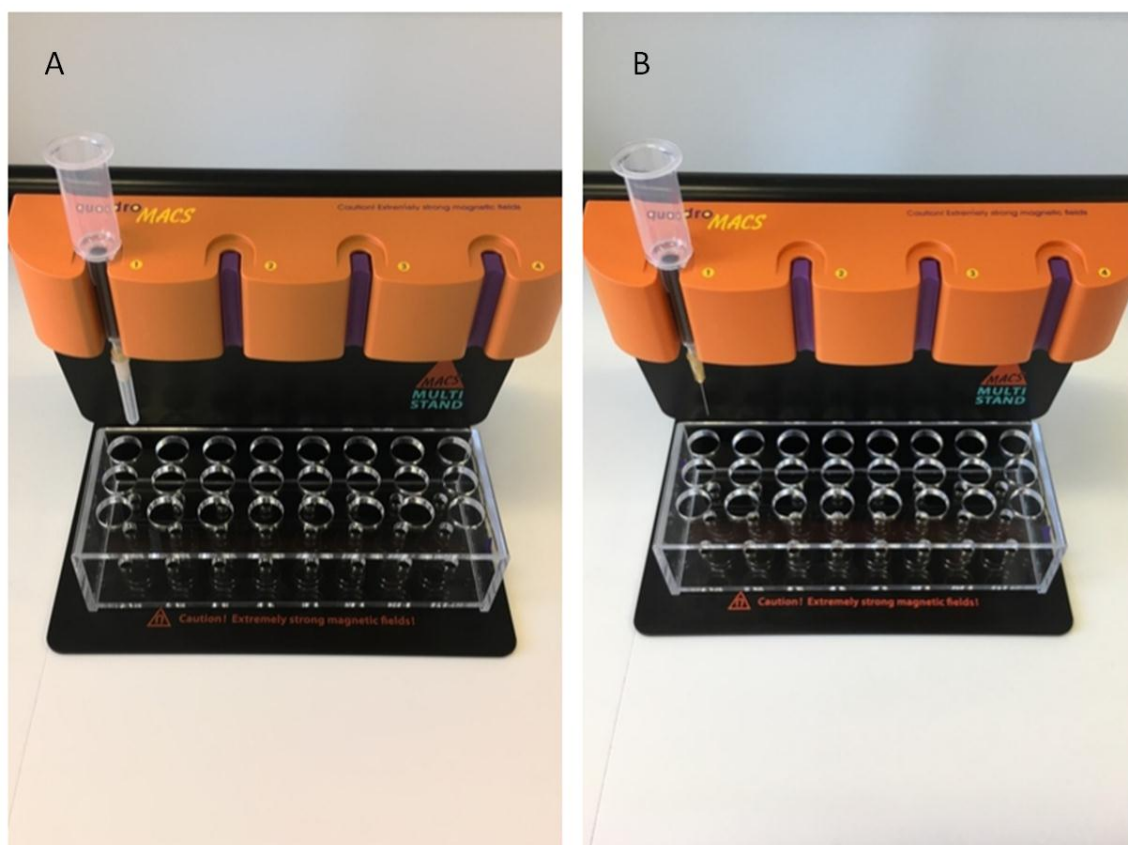

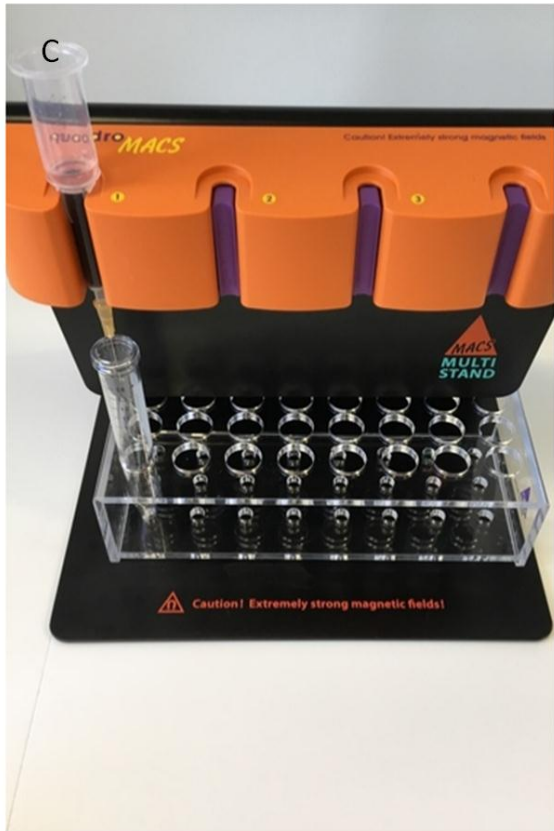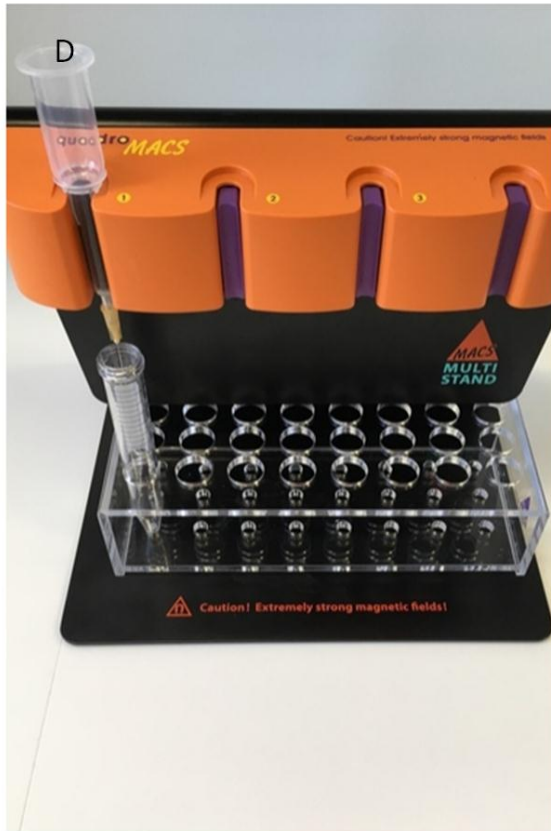

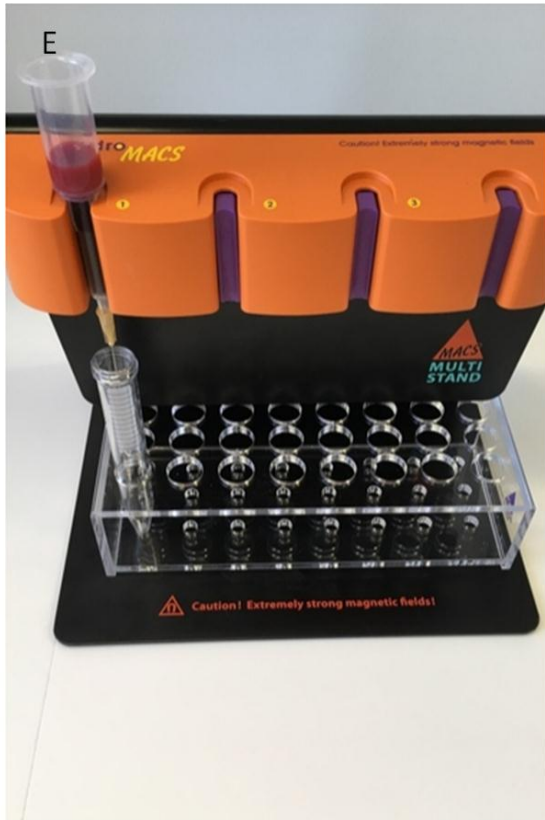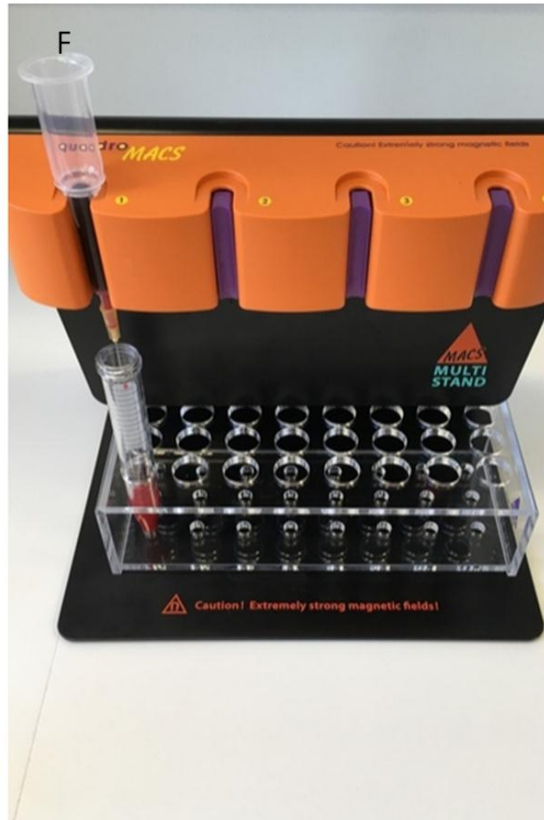

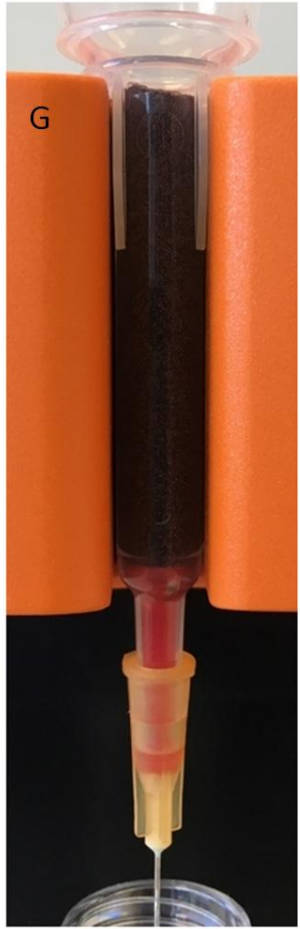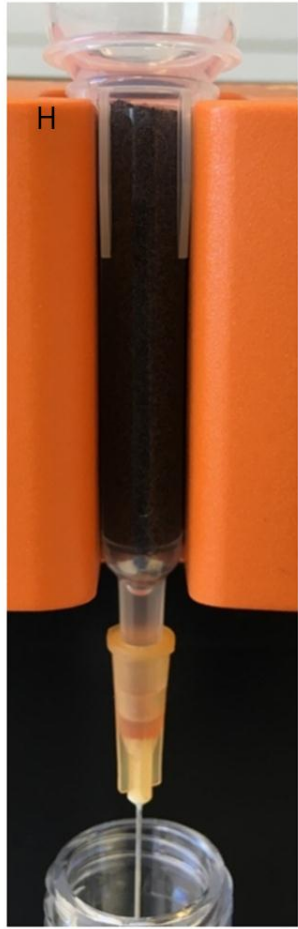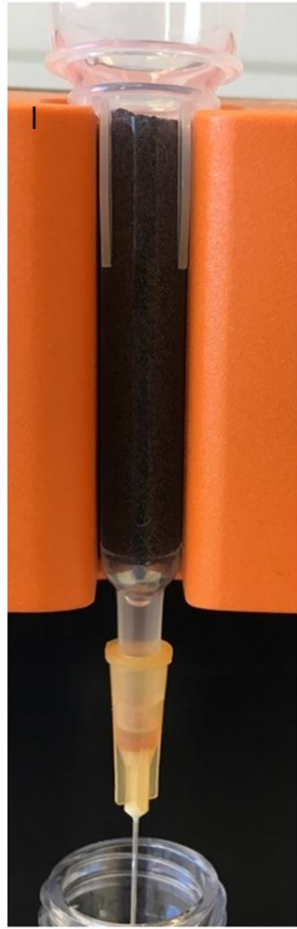

### Supplemental Figure S3. qRT-PCR standard curves

Standard qRT-PCR curves for detection of male gametocytes (PfMGET, texas red) and female gametocytes (CCp4, FAM) obtained using 10 fold dilutions of cultured gametocytes.

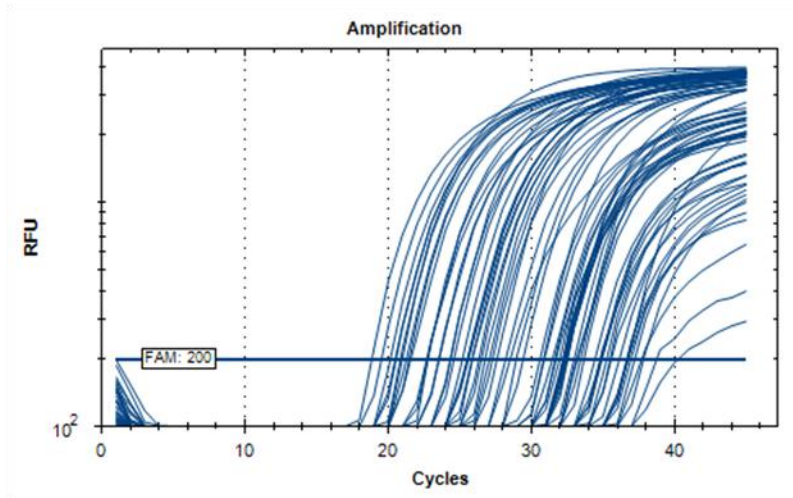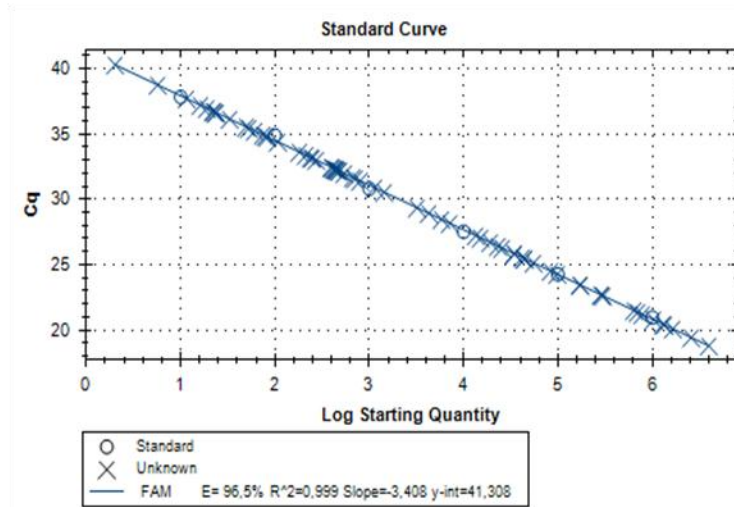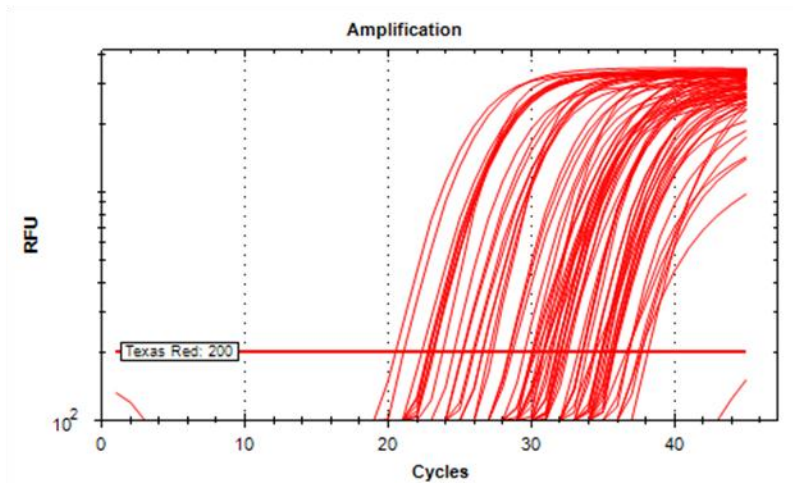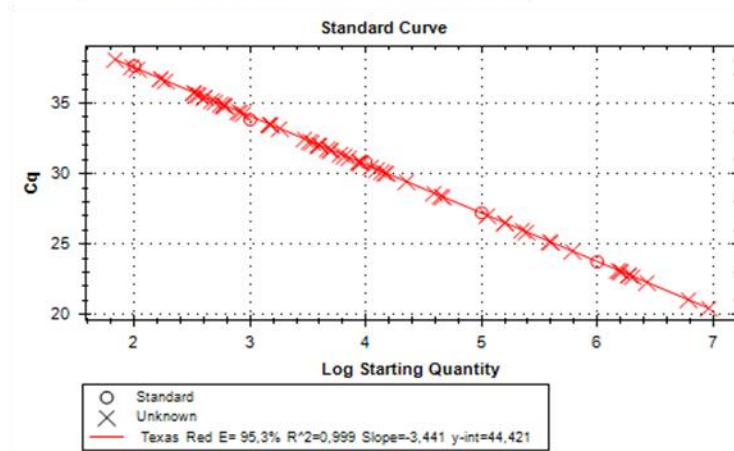

Supplement: tpmd180773.SD1.pdf [file tpmd180773.SD1.pdf]
